# Supplementary material for: Modulation and binding properties of extended glycoluril molecular clips
Source: Royal Society of Chemistry journal article supplement (doi:10.1039/b715208f), 2008-01-01
Supplement: b715208f.pdf [file b715208f.pdf]

**Supplementary material****Modulation and Binding Properties of Extended Glycoluril Molecular Clips**Prasad Polavarapu,<sup>a</sup> Helena Melander,<sup>a</sup> Vratislav Langer,<sup>b</sup> Adolf Gogoll,<sup>a\*</sup> Helena Grennberg<sup>a,\*</sup>

a) Dept. of Biochemistry and Organic Chemistry, Uppsala University, Box 576, S-75123 Uppsala, Sweden

b) Environmental Inorganic Chemistry, Dept. of Chemical and Biological Engineering, Chalmers University of Technology, S-412 96 Gothenburg, Sweden

\*To whom correspondence should be addressed. Email:  
Adolf.Gogoll@biorg.uu.se, Helena.Grennberg@biorg.uu.se

|                                                                                               |    |
|-----------------------------------------------------------------------------------------------|----|
| 1. NMR Titrations of clip 1.....                                                              | 2  |
| (a) Clip 1 with H <sub>2</sub> O.....                                                         | 2  |
| (b) Clip 1 with resorcinol.....                                                               | 3  |
| Clip 1 – resorcinol precipitate.....                                                          | 5  |
| (c) Clip 1 with AgClO <sub>4</sub> .....                                                      | 6  |
| (d) Clip 1 with NH <sub>4</sub> PF <sub>6</sub> .....                                         | 12 |
| (e) Clip 1 with Trifluoroacetic acid (TFA).....                                               | 16 |
| 2. NMR Titrations of clip 2.....                                                              | 17 |
| (a) Clip 2 with resorcinol.....                                                               | 17 |
| (b) Clip 2 with AgClO <sub>4</sub> .....                                                      | 17 |
| (c) Clip 2 with NH <sub>4</sub> PF <sub>6</sub> .....                                         | 19 |
| 3. NMR Titrations of clip 3.....                                                              | 20 |
| (a) Clip 3 with H <sub>2</sub> O.....                                                         | 20 |
| (c) Clip 3 with AgClO <sub>4</sub> .....                                                      | 22 |
| 4. Overview charts – Chemical shift changes.....                                              | 23 |
| (a) Clips with resorcinol.....                                                                | 23 |
| (b) Clips with AgClO <sub>4</sub> .....                                                       | 24 |
| (c) Clips with NH <sub>4</sub> PF <sub>6</sub> .....                                          | 25 |
| 6. Inclusion compound [clip 1]:[PhNO <sub>2</sub> ].....                                      | 26 |
| 7. Clip wall distances.....                                                                   | 27 |
| 8. Hydrogen bond parameters for clip 1·NH <sub>4</sub> PF <sub>6</sub> crystal structure..... | 28 |

## 1. NMR Titrations of clip 1.

### (a) Clip 1 with H<sub>2</sub>O.

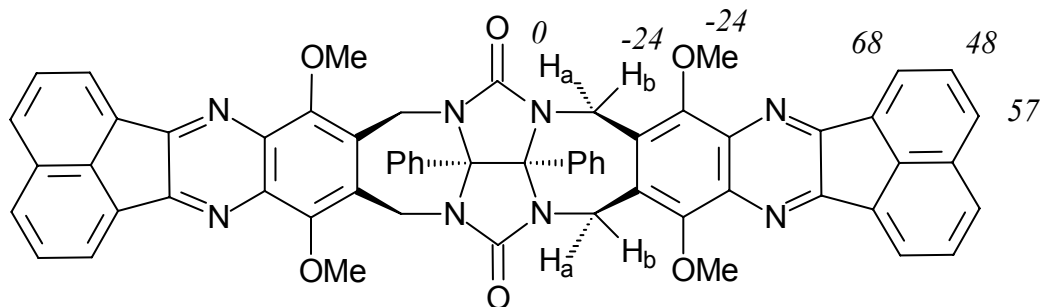

Figure S1: Temperature dependent <sup>1</sup>H NMR chemical shift changes  $\Delta\delta$  (ppb) for clip 1 in the presence of water. Numbers correspond to the chemical shift difference  $\Delta\delta$  in ppb when the temperature was varied from 25 °C to -55 °C. ( $\Delta\delta = \delta_{-55\text{ °C}} - \delta_{25\text{ °C}}$ ).

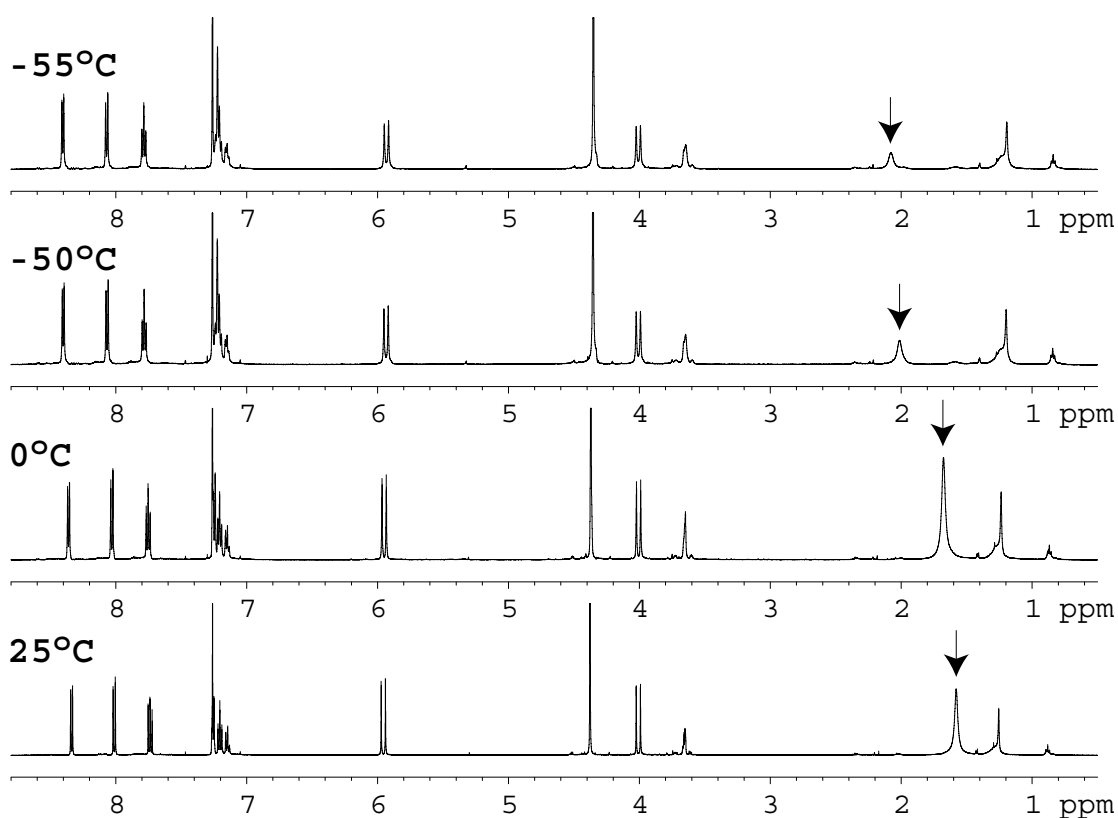

Figure S2: <sup>1</sup>H NMR spectra of clip 1 in the presence of water (500 MHz, CDCl<sub>3</sub> solution) recorded at the indicated temperatures. The arrow indicates the position of the water signal.

**(b) Clip 1 with resorcinol.**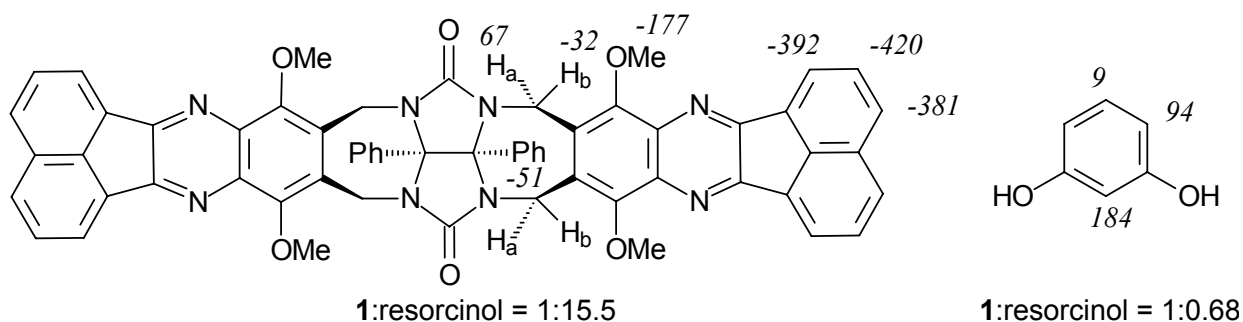

Figure S3:  $^1\text{H}$  NMR chemical shift changes  $\Delta\delta$  (ppb) for clip 1 and resorcinol. Values for clip 1 correspond to a clip:resorcinol ratio of 1:15.5. Values for resorcinol correspond to a clip>resorcinol ratio of 1:0.68.  $\Delta\delta = \delta_{(1+\text{resorcinol})} - \delta_1$  (or  $\delta_{(\text{resorcinol})}$ ).

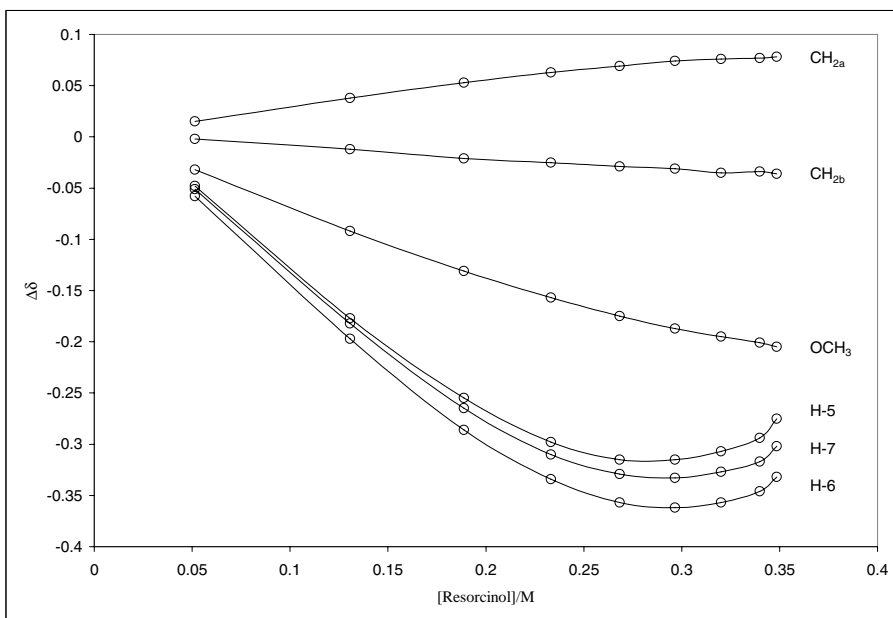

Figure S4: Chemical shift changes vs. resorcinol concentration for selected protons of clip 1 ( $\text{CDCl}_3$  solution, 500 MHz,  $25^\circ\text{C}$ ).  $[\text{clip } 1] = 0.082 \text{ M}$ .

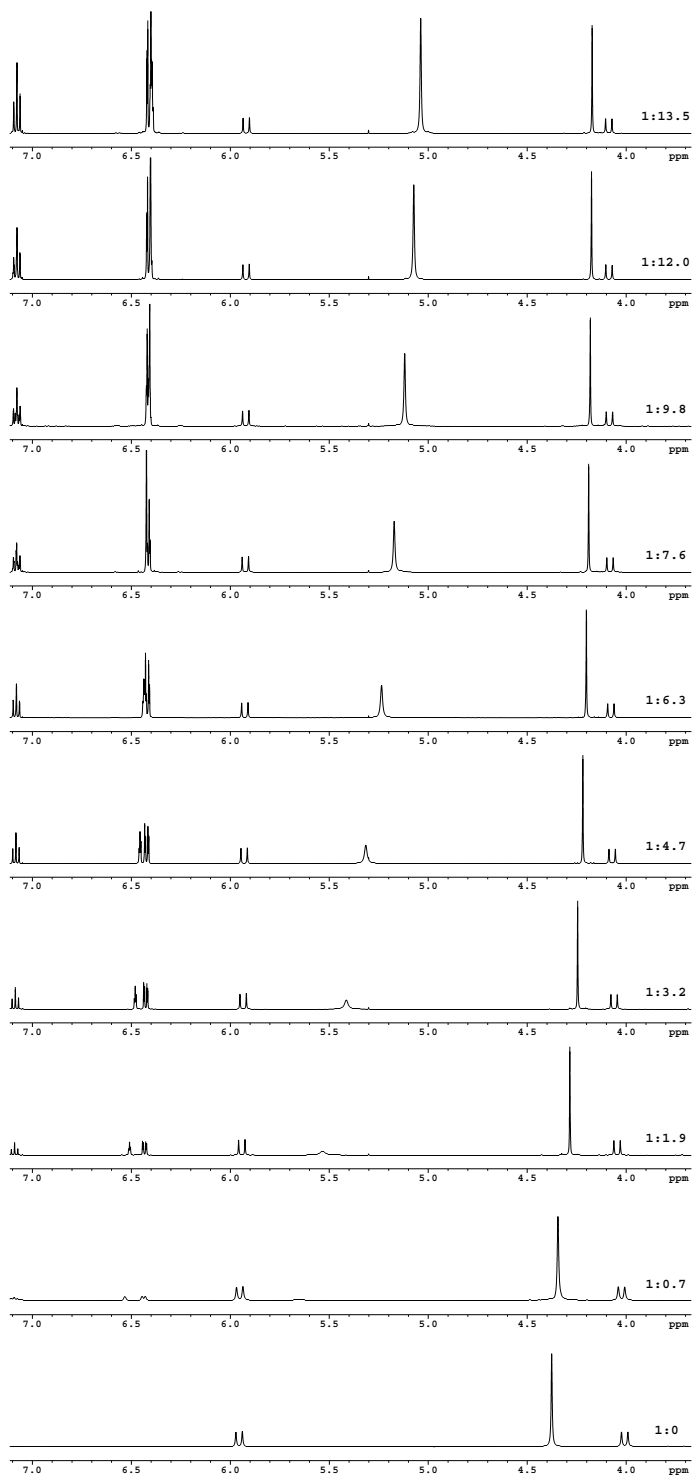

Figure S5: Expansions of  $^1\text{H}$  NMR spectra showing resorcinol and aliphatic clip proton signals observed upon titration of a solution of clip **1** with resorcinol ( $\text{CDCl}_3$  solution, 500 MHz,  $25^\circ\text{C}$ ). Molecular ratios of clip **1**:resorcinol are indicated.

**Clip 1 – resorcinol precipitate**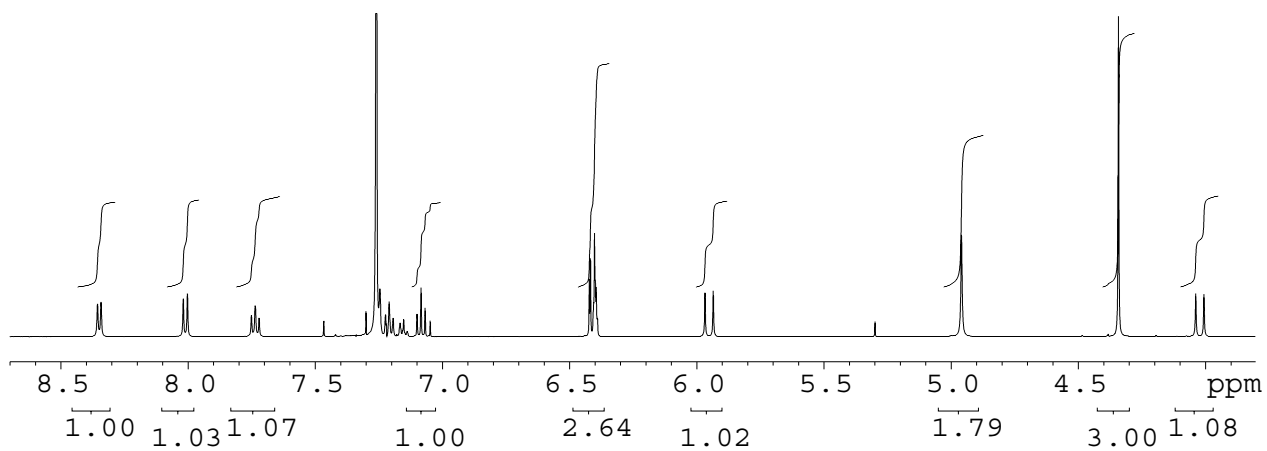

Figure S6: <sup>1</sup>H NMR spectrum of collected precipitate obtained from a solution of clip **1** + excess of resorcinol (500 MHz, CDCl<sub>3</sub> solution).

**(c) Clip 1 with AgClO<sub>4</sub>.**

Table S1: <sup>1</sup>H NMR chemical shift changes for clip **1** upon addition of AgClO<sub>4</sub>.  $\Delta\delta = \delta_{(1+Ag^+)} - \delta_1$ . Solvent CDCl<sub>3</sub>:CD<sub>3</sub>OD 9:1.

| 1:Ag <sup>+</sup> |    | H <sub>2a</sub>                                 | H <sub>2b</sub> | H <sub>5</sub>        | H <sub>6</sub> | H <sub>7</sub> | CH <sub>3</sub> | Ph       |
|-------------------|----|-------------------------------------------------|-----------------|-----------------------|----------------|----------------|-----------------|----------|
| 1:0               | δ  | 3.952                                           | 5.840           | 8.251                 | 7.644          | 7.927          | 4.244           | 7.114    |
| 1:0.2             | δ  | 3.954                                           | 5.839           | 8.231                 | 7.630          | 7.913          | 4.241           | 7.120    |
|                   | Δδ | 0.002                                           | 0.001           | -0.020                | -0.014         | -0.014         | 0.003           | 0.006    |
| 1:0.6             | δ  | 3.958                                           | 5.835           | 8.192                 | 7.601          | 7.885          | 4.234           | 7.121    |
|                   | Δδ | 0.006                                           | -0.010          | -0.060                | -0.043         | -0.042         | -0.01           | 0.007    |
| 1:0.8             | δ  | 3.959                                           | 5.835           | 8.175                 | 7.589          | 7.873          | 4.231           | 7.122    |
|                   | Δδ | 0.007                                           | -0.010          | -0.080                | -0.055         | -0.054         | -0.013          | 0.008    |
| 1:1               | δ  | 3.973                                           | 5.830           | 8.1(br)               | 7.52(br)       | 7.82(br)       | 4.213           | 7.13     |
|                   | Δδ | 0.021                                           | -0.010          | -0.150                | -0.124         | -0.107         | -0.031          | 0.016    |
| 1:1.2             | δ  | 3.995                                           | 5.816           | small and broad peaks |                |                | 4.177(br)       | 7.15(br) |
|                   | Δδ | 0.043                                           | -0.020          |                       |                |                | -0.067          | 0.036    |
| 1:2               | δ  | 4.018(br)                                       | 5.755           | No peaks              |                |                | 4.076           | 7.2      |
|                   | Δδ | 0.066                                           | -0.090          |                       |                |                | -0.168          | 0.086    |
| 1:3               | δ  | -                                               | 5.730           |                       |                |                | 4.037           | 7.21     |
|                   | Δδ |                                                 | -0.110          |                       |                |                | -0.207          | 0.096    |
| 1:4.4             | δ  | 4.120                                           | 5.735           |                       |                |                | 4.010           | 7.22     |
|                   | Δδ | 0.168                                           | -0.110          |                       |                |                | -0.234          | 0.106    |
| 1:7               | δ  | Very small and broad signals                    |                 |                       |                |                |                 |          |
| 1:11              | δ  | All signals corresponding to <b>1</b> disappear |                 |                       |                |                |                 |          |

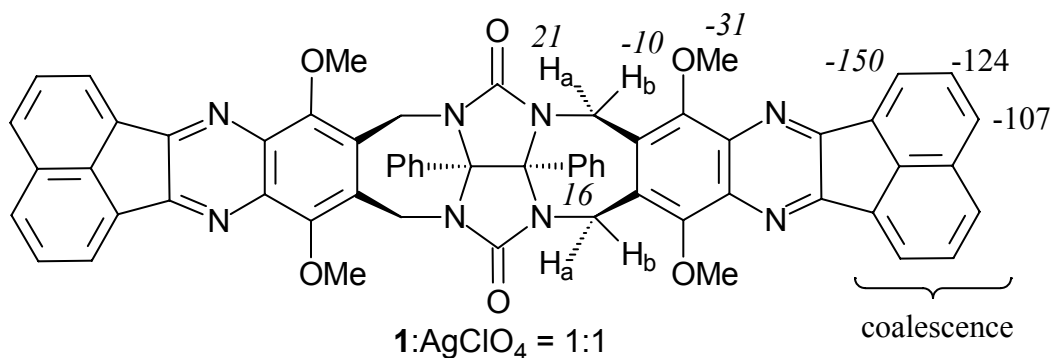

Figure S7: <sup>1</sup>H NMR chemical shift changes  $\Delta\delta$  (in ppb) for clip **1** for clip:Ag<sup>+</sup> ratio of 1:1.

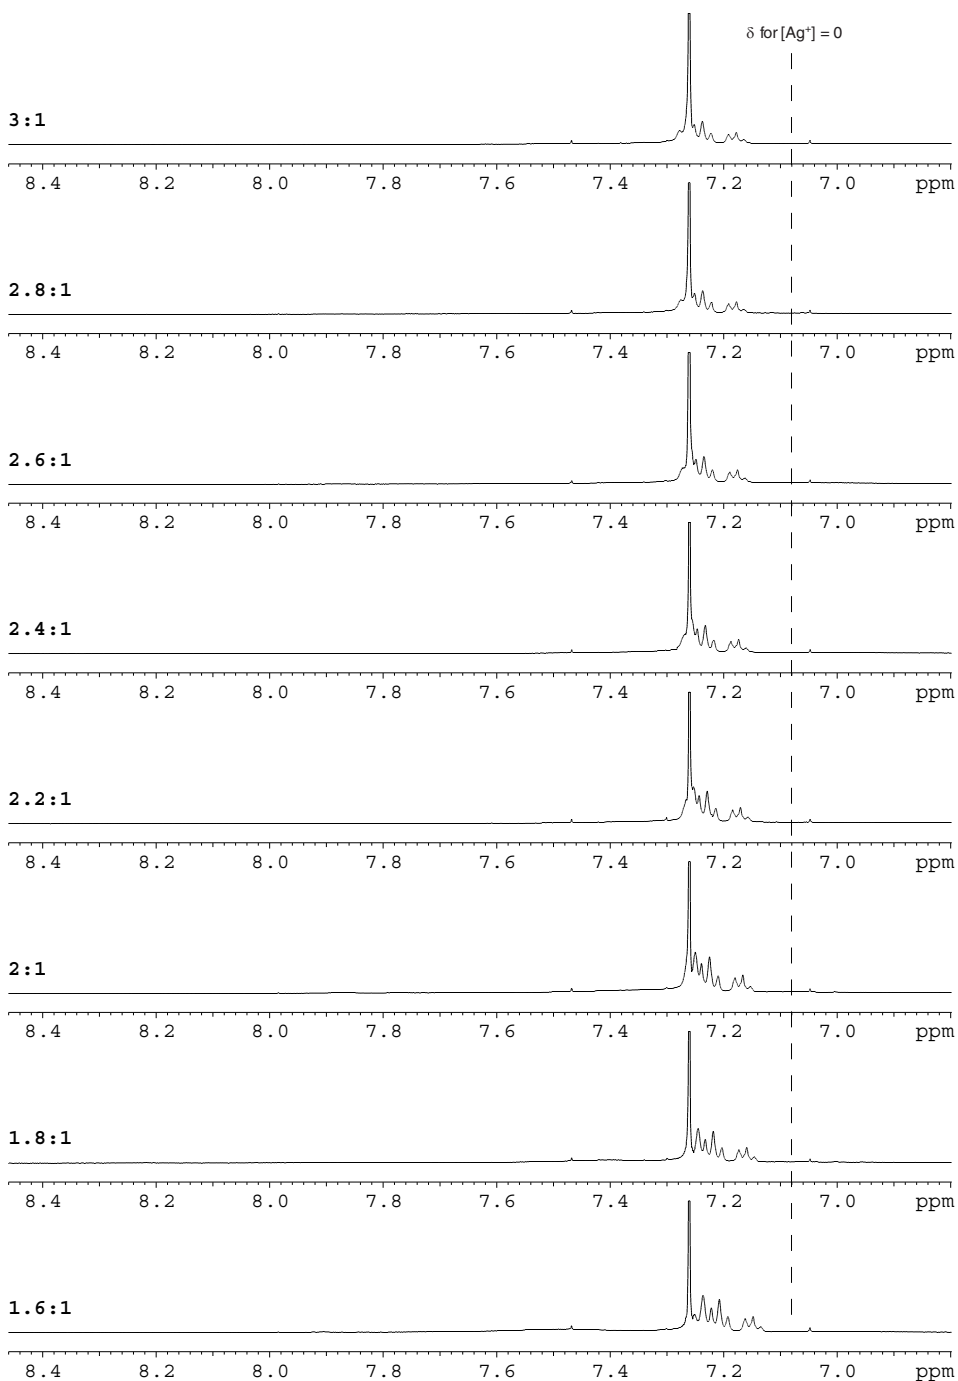

Figure S8: Expansion of aromatic region of  $^1\text{H}$  NMR spectra with various  $\text{Ag}^+:\text{clip 1}$  ratios (500 MHz, solvent  $\text{CDCl}_3:\text{MeOH-d}_4$  9:1) (continued from **Error! Reference source not found.**). Aliquots of  $\text{AgClO}_4$  solution added to clip 1, ratios indicated on left hand side of spectra. The dashed line indicates the  $\delta$  of *para*-Ph protons in the absence of  $\text{Ag}^+$  (continued overleaf).

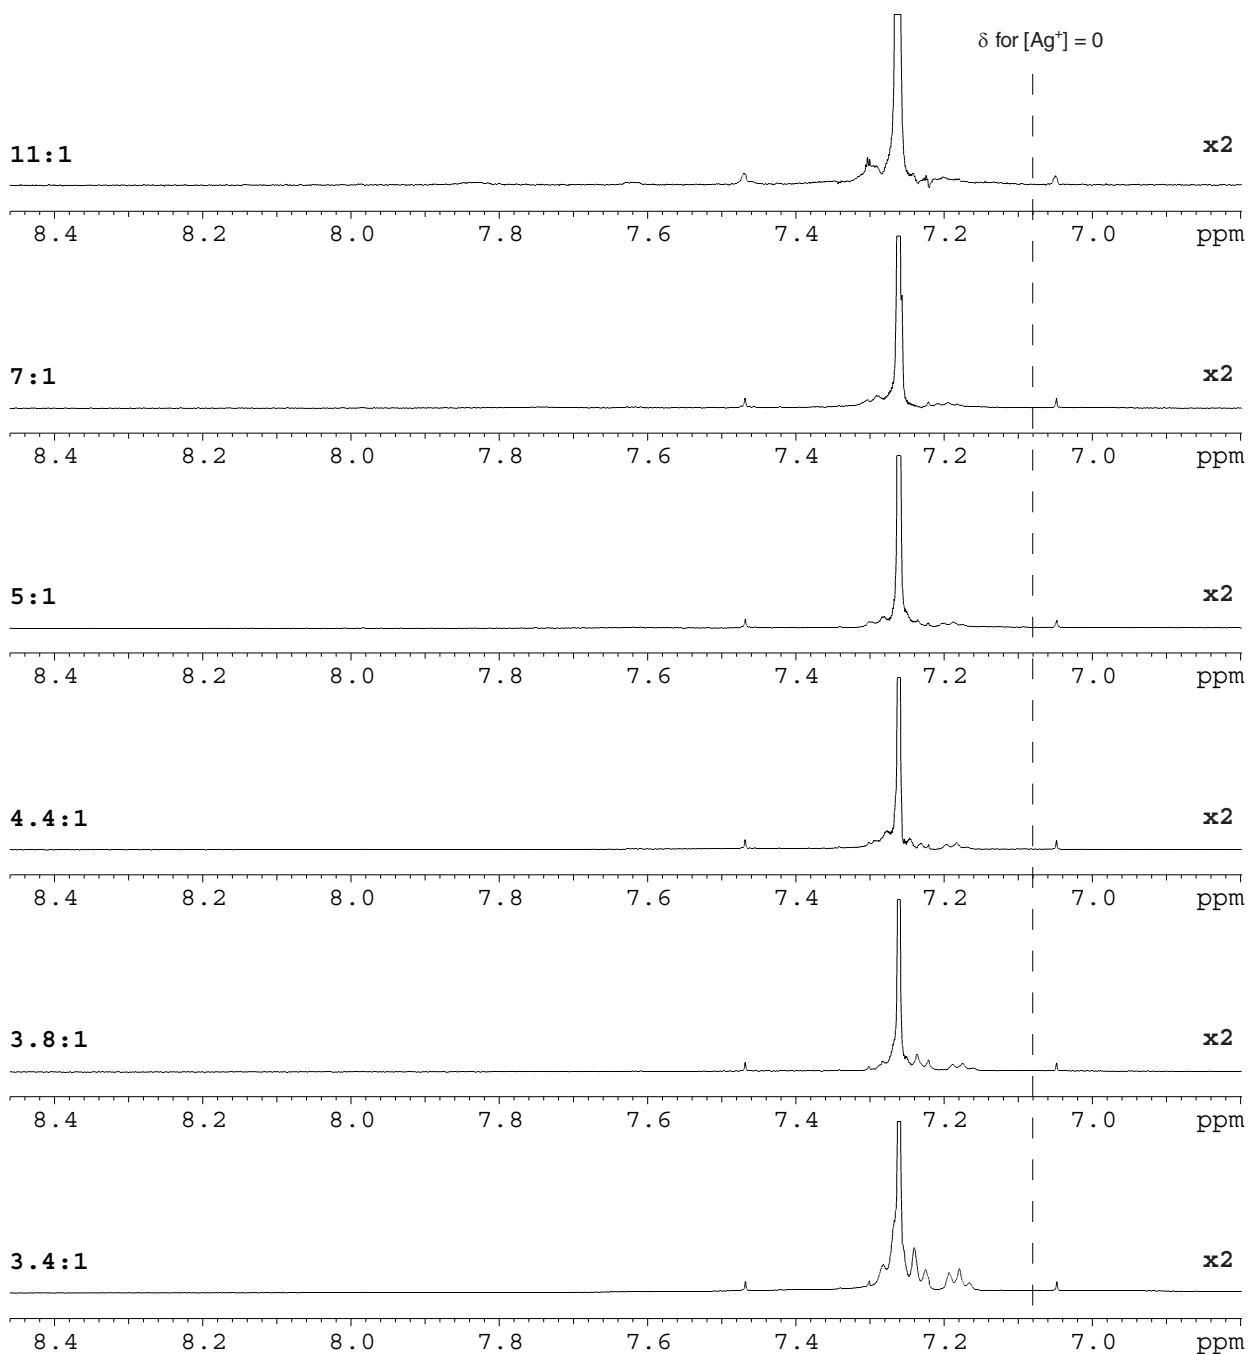

Figure S9: Expansion of aromatic region of  $^1\text{H}$  NMR spectra with various  $\text{Ag}^+$ : clip **1** ratios (500 MHz, solvent  $\text{CDCl}_3:\text{MeOH}-d_4$  9:1) (continued from previous Figure). Aliquots of  $\text{AgClO}_4$  solution added to clip **1**, ratios indicated on left hand side of spectra. The vertical scale was increased two times compared to Figures for lower  $\text{Ag}^+$ : clip **1** ratios.

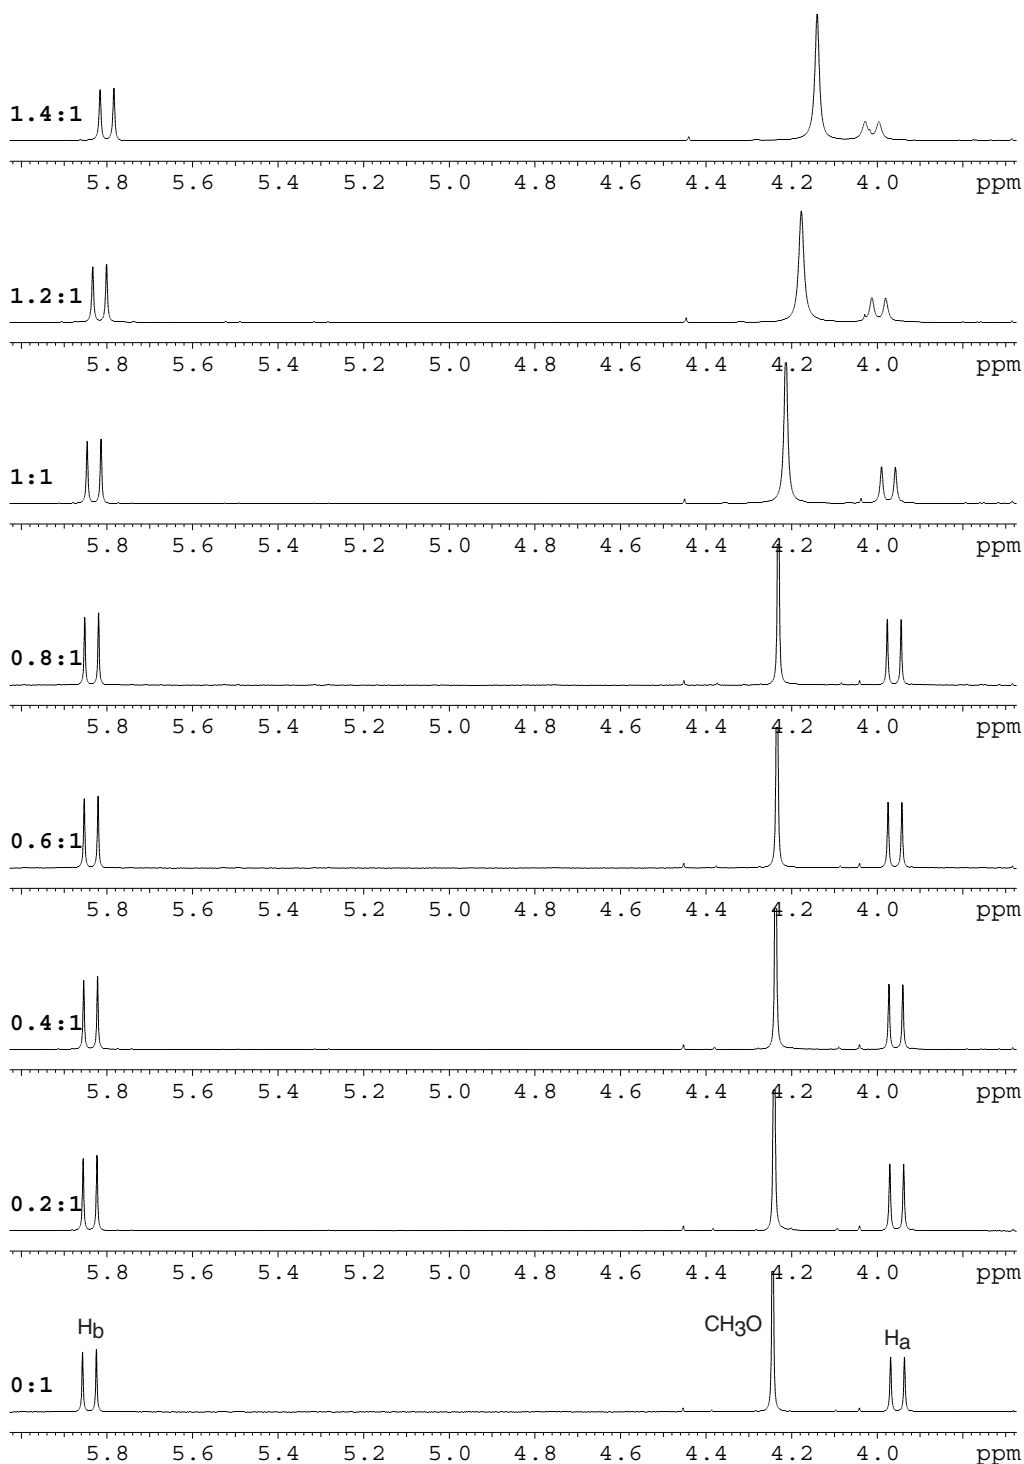

Figure S10: Expansion of aliphatic region of  $^1\text{H}$  NMR spectra with various  $\text{Ag}^+$ : clip **1** ratios (500 MHz, solvent  $\text{CDCl}_3$ : $\text{MeOH-d}_4$  9:1). Aliquots of  $\text{AgClO}_4$  solution added to clip **1**, ratios indicated on left hand side of spectra. Observe the change of chemical shift as well as broadening of the  $\text{CH}_2$  proton oriented towards the outside of the cleft and the methoxy protons starting to change beyond the 1:1 ratio (continued overleaf).

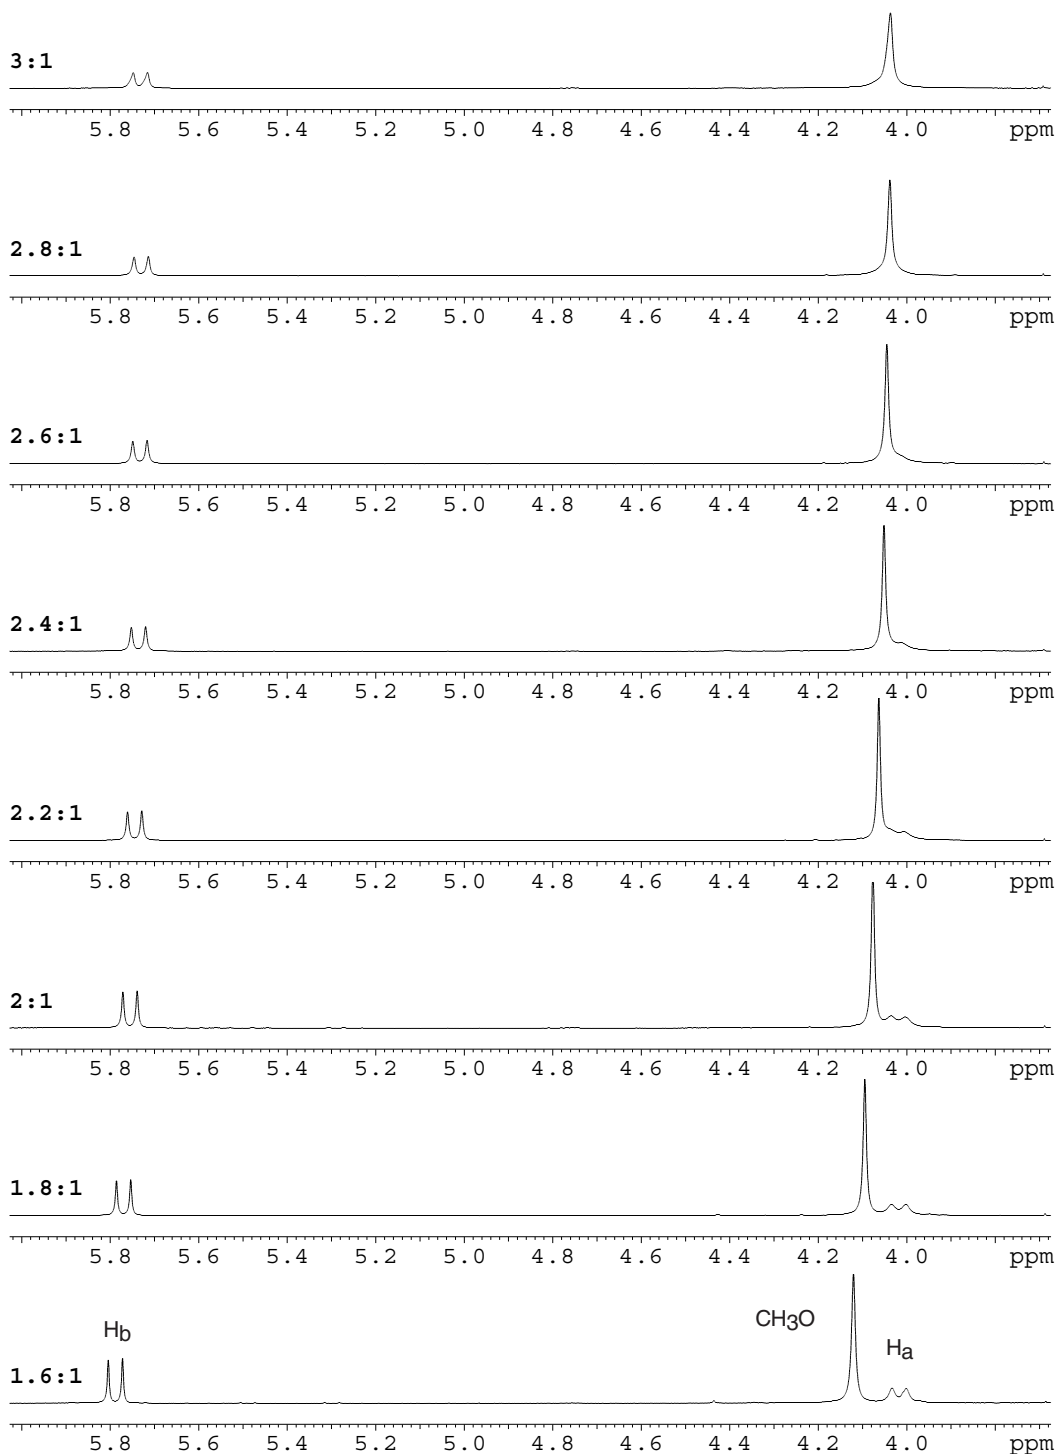

Figure S11: Expansion of the aliphatic region of  $^1\text{H}$  NMR spectra with variable  $\text{Ag}^+$  : clip **1** ratios (500 MHz, solvent  $\text{CDCl}_3$ : $\text{MeOH-d}_4$  9:1) (continued from previous Figure). Aliquots of  $\text{AgClO}_4$  solution added to clip **1**, ratios indicated on left hand side of spectra. Observe the change of chemical shift as well as broadening of the  $\text{CH}_2$  proton oriented outside of the cleft ( $\text{H}_a$ ) and the methoxy protons starting to change beyond the 1:1 ratio (continued overleaf).

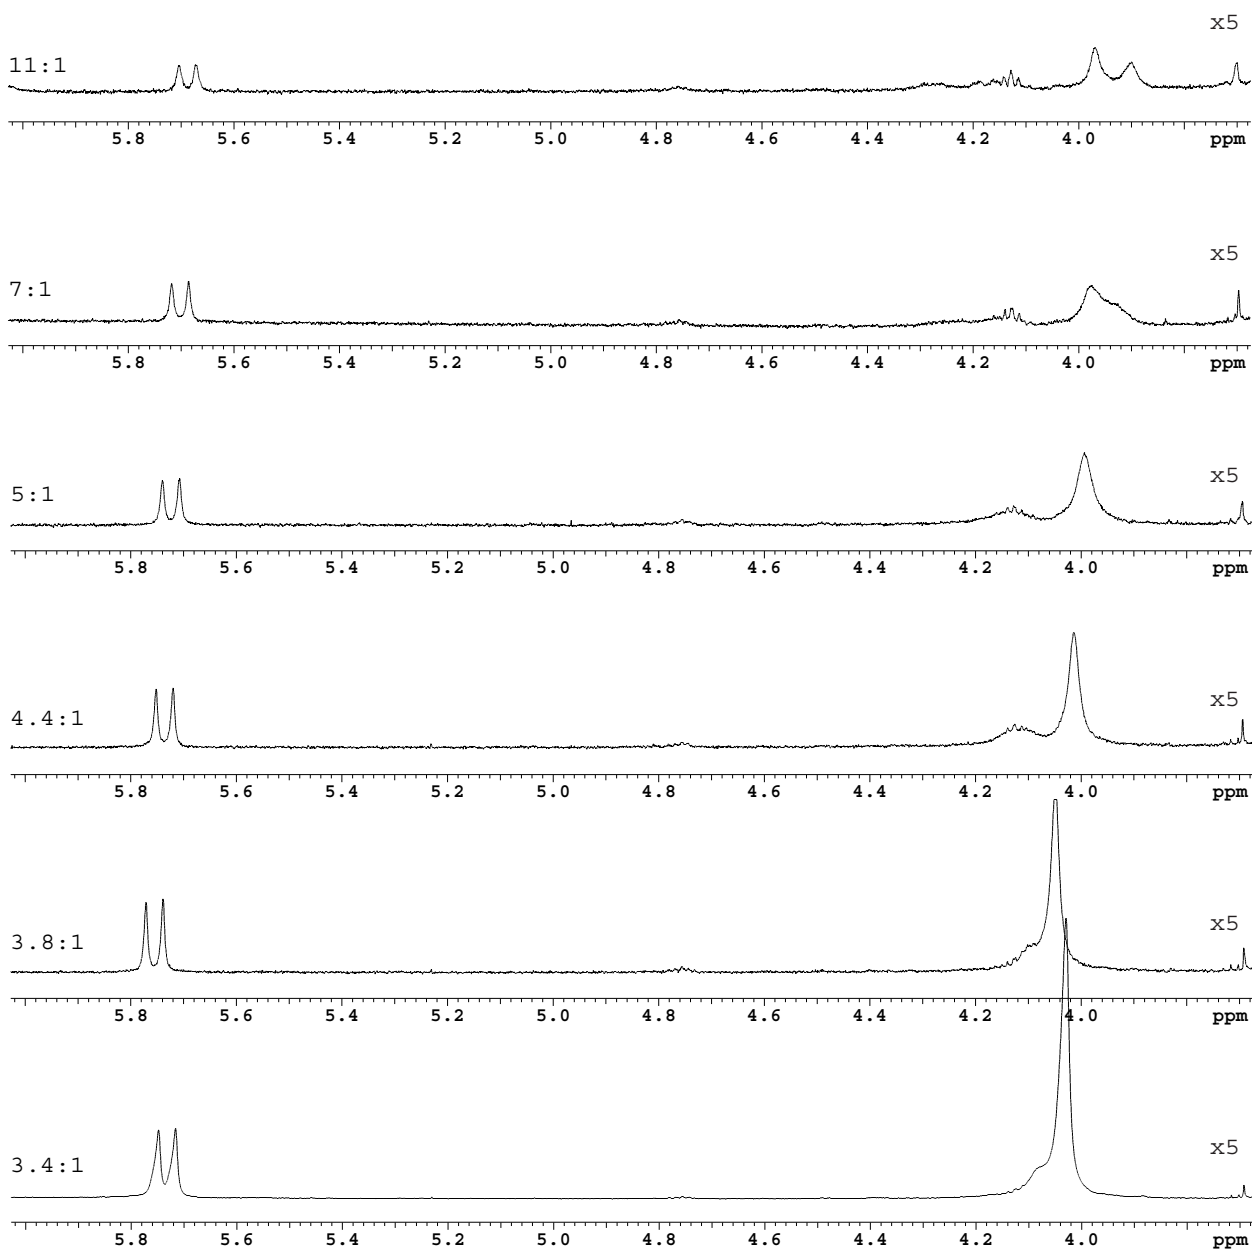

Figure S12: Expansion of the aliphatic region of  $^1\text{H}$  NMR spectra with variable  $\text{Ag}^+$ : clip 1 ratios (500 MHz, solvent  $\text{CDCl}_3:\text{MeOH-d}_4$  9:1) (continued from previous Figure). Aliquots of  $\text{AgClO}_4$  solution added to clip 1, ratios indicated on left hand side of spectra.

**(d) Clip 1 with NH<sub>4</sub>PF<sub>6</sub>**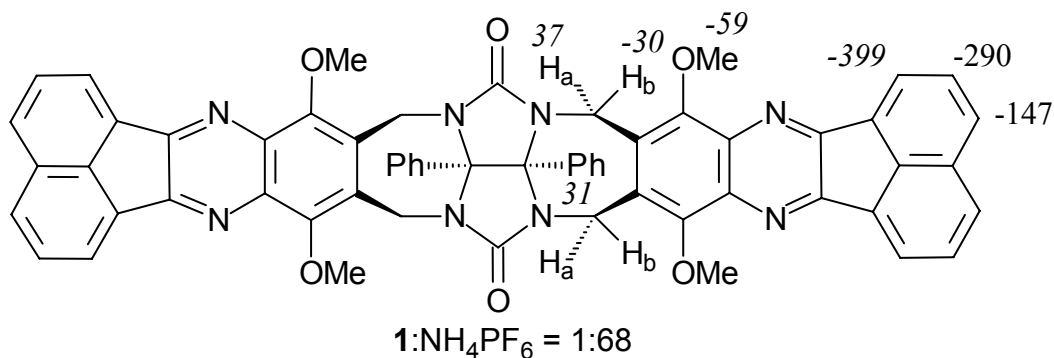Figure S13: <sup>1</sup>H NMR chemical shift changes  $\Delta\delta$  (in ppb) for clip **1** for clip:NH<sub>4</sub><sup>+</sup> ratio of 1:68.Table S2: <sup>1</sup>H NMR chemical shift changes for clip **1** upon addition of NH<sub>4</sub>PF<sub>6</sub>.  $\Delta\delta = \delta_{(1+\Delta g^+)} - \delta_1$ . Solvent CDCl<sub>3</sub>:CD<sub>3</sub>OD 7:3.

| 1:NH <sub>4</sub> <sup>+</sup> |                | H <sub>5</sub> | H <sub>6</sub> | H <sub>7</sub> | Ph    |
|--------------------------------|----------------|----------------|----------------|----------------|-------|
| 1:0                            | $\delta$       | 8.141          | 7.540          | 7.831          | 7.059 |
| 1:1.1                          | $\delta$       | 8.106          | 7.513          | 7.818          | 7.062 |
|                                | $\Delta\delta$ | -0.035         | -0.027         | -0.013         | 0.003 |
| 1:2.3                          | $\delta$       | 8.062          | 7.481          | 7.801          | 7.065 |
|                                | $\Delta\delta$ | -0.079         | -0.059         | -0.030         | 0.006 |
| 1:3.4                          | $\delta$       | 8.016          | 7.446          | 7.783          | 7.069 |
|                                | $\Delta\delta$ | -0.125         | -0.094         | -0.048         | 0.010 |
| 1:5.1                          | $\delta$       | 7.991          | 7.427          | 7.774          | 7.070 |
|                                | $\Delta\delta$ | -0.150         | -0.113         | -0.057         | 0.011 |
| 1:6.8                          | $\delta$       | 7.960          | 7.404          | 7.762          | 7.073 |
|                                | $\Delta\delta$ | -0.181         | -0.136         | -0.069         | 0.014 |
| 1:8.5                          | $\delta$       | 7.922          | 7.377          | 7.748          | 7.075 |
|                                | $\Delta\delta$ | -0.219         | -0.163         | -0.083         | 0.016 |
| 1:10.8                         | $\delta$       | 7.901          | 7.361          | 7.741          | 7.077 |
|                                | $\Delta\delta$ | -0.240         | -0.179         | -0.090         | 0.018 |
| 1:13.7                         | $\delta$       | 7.879          | 7.346          | 7.732          | 7.078 |
|                                | $\Delta\delta$ | -0.262         | -0.194         | -0.099         | 0.019 |
| 1:17.1                         | $\delta$       | 7.853          | 7.326          | 7.722          | 7.081 |
|                                | $\Delta\delta$ | -0.288         | -0.214         | -0.109         | 0.022 |
| 1:22.8                         | $\delta$       | 7.810          | 7.295          | 7.707          | 7.084 |
|                                | $\Delta\delta$ | -0.331         | -0.245         | -0.124         | 0.025 |
| 1:28.5                         | $\delta$       | 7.798          | 7.286          | 7.702          | 7.085 |
|                                | $\Delta\delta$ | -0.343         | -0.254         | -0.129         | 0.026 |
| 1:34.2                         | $\delta$       | 7.778          | 7.272          | 7.695          | 7.086 |
|                                | $\Delta\delta$ | -0.363         | -0.268         | -0.136         | 0.027 |
| 1:39.9                         | $\delta$       | 7.766          | 7.260          | 7.691          | 7.088 |
|                                | $\Delta\delta$ | -0.375         | -0.280         | -0.140         | 0.029 |
| 1:51.3                         | $\delta$       | 7.753          | 7.260          | 7.686          | 7.089 |
|                                | $\Delta\delta$ | -0.388         | -0.280         | -0.145         | 0.030 |
| 1:68.3                         | $\delta$       | 7.742          | 7.250          | 7.684          | 7.090 |
|                                | $\Delta\delta$ | -0.399         | -0.290         | -0.147         | 0.031 |
